# Supplementary material for: Direct Hydroxylation of Benzene with Hydrogen Peroxide Using Fe Complexes Encapsulated into Mesoporous Y-Type Zeolite
Source: MDPI journal article supplement (doi:10.3390/molecules27206852), 2022-10-13
Supplement: s1 [file s1]

**Direct hydroxylation of benzene with hydrogen peroxide using Fe complexes encapsulated into mesoporous Y-type zeolite**

Syuhei Yamaguchi,\* Yuito Ishida, Hitomu Koga, and Hidenori Yahiro

Department of Materials Science and Biotechnology, Graduate School of Science and Engineering, Ehime University, 3 Bunkyo-cho, Matsuyama 791-8577, Japan

\*Corresponding author: Tel: +81-89-927-9927.

E-mail: syuhei@ehime-u.ac.jp (S. Yamaguchi)

Table S1. ICP-AES results for FeL-MYZ-t and FeL-YZ catalysts.

|             | Si/ wt. % | Al/ wt. % | Na/ wt. % | Fe/ wt. % | Si/Al |
|-------------|-----------|-----------|-----------|-----------|-------|
| FeL-YZ      | 25.9      | 7.9       | 6.1       | 0.9       | 3.1   |
| FeL-MYZ-0   | 28.1      | 4.4       | 2.7       | 1.1       | 6.1   |
| FeL-MYZ-0.5 | 26.2      | 6.5       | 4.8       | 1.0       | 3.9   |
| FeL-MYZ-1.0 | 26.1      | 6.7       | 4.7       | 1.2       | 3.7   |
| FeL-MYZ-5.0 | 26.6      | 7.2       | 5.0       | 1.0       | 3.5   |
| FeL-MYZ-16  | 26.0      | 7.5       | 5.1       | 1.2       | 3.3   |
| FeL-MYZ-24  | 26.0      | 7.4       | 5.2       | 1.2       | 3.4   |

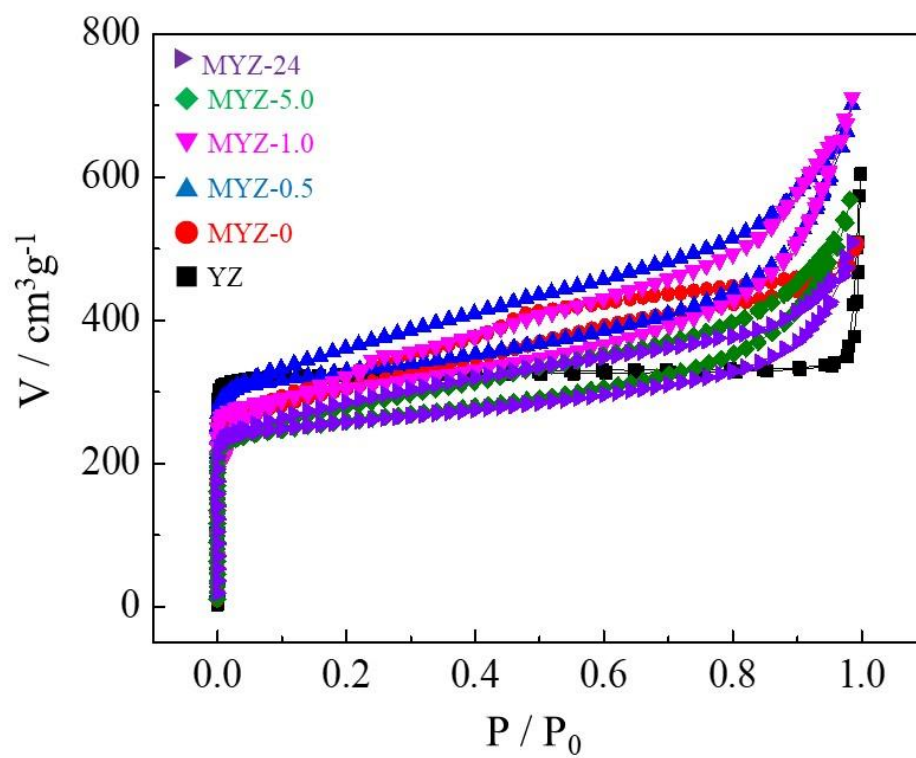

Figure S1. N<sub>2</sub> absorption-desorption isotherm of MYZ-t and YZ at 77 K.

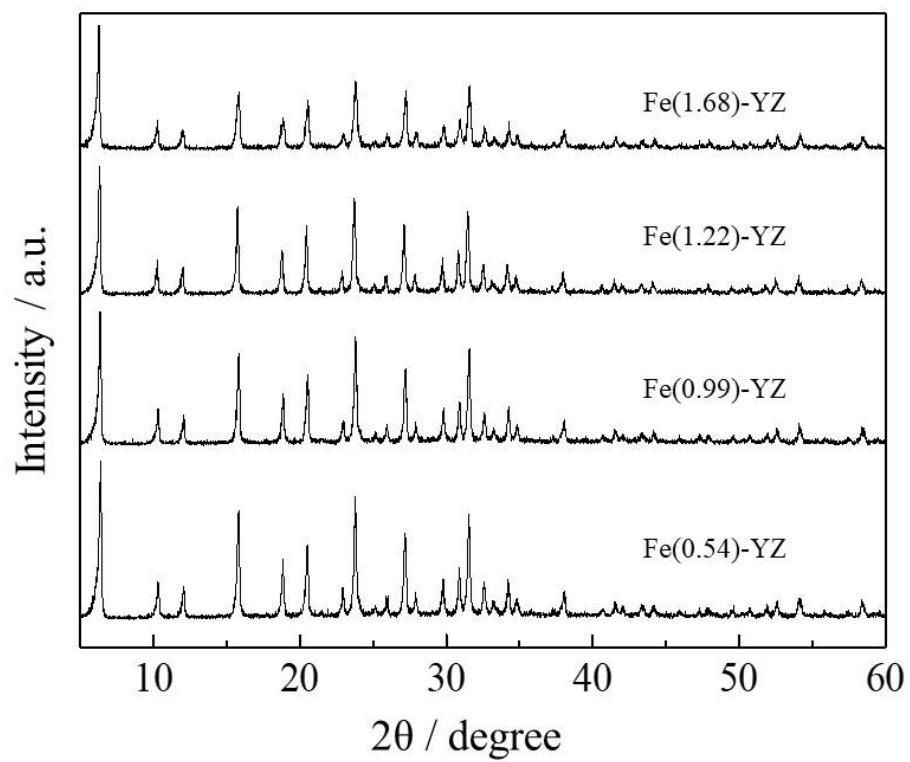

Figure S2. XRD patterns of Fe(X)-YZ.

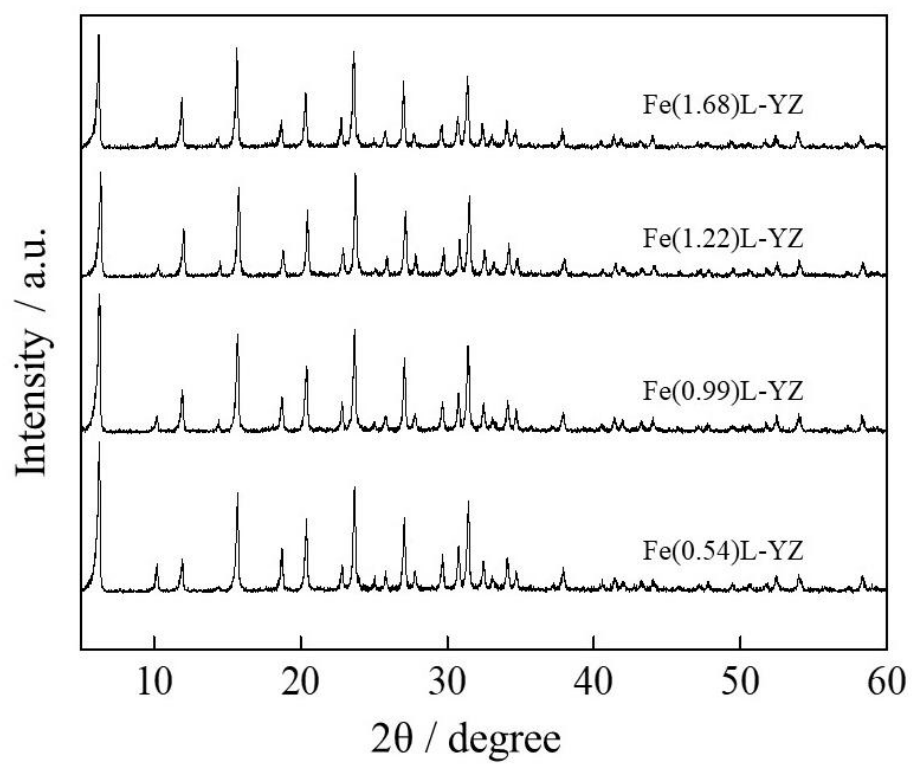

Figure S3. XRD patterns of Fe(X)L-YZ catalysts.

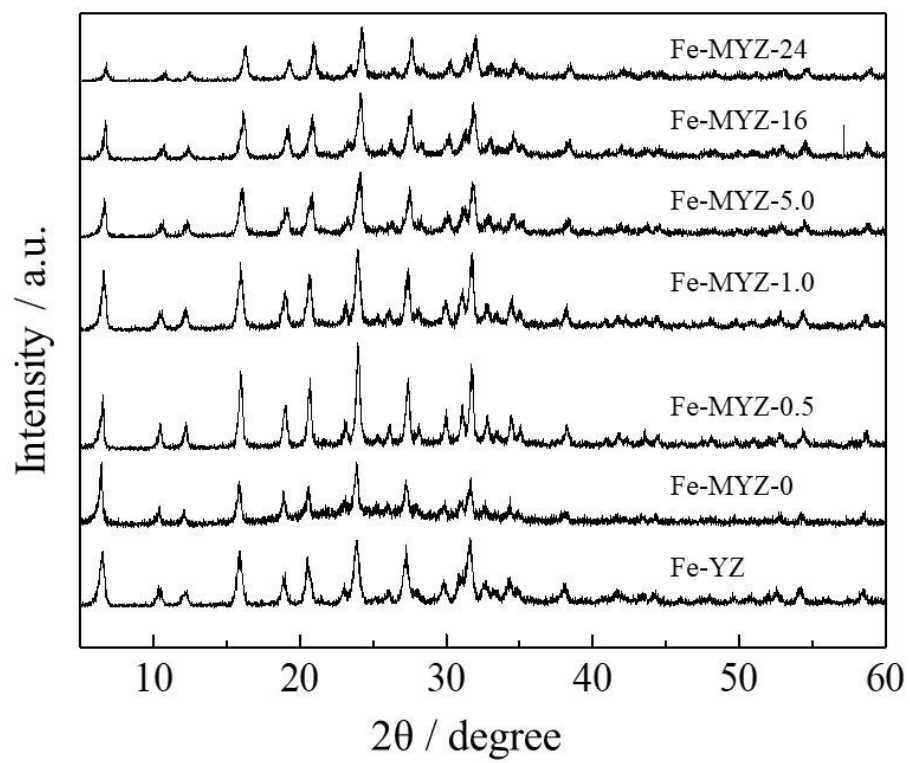

Figure S4. XRD patterns of Fe-MYZ-t and Fe-YZ.

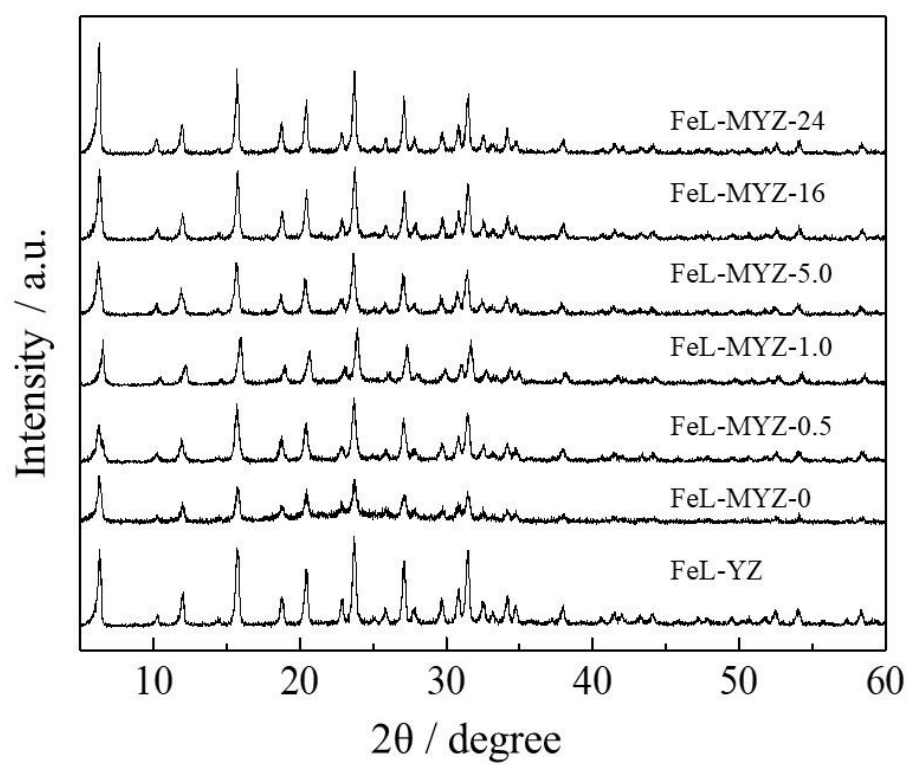

Figure S5. XRD patterns of FeL-MYZ-t and FeL-YZ catalysts.

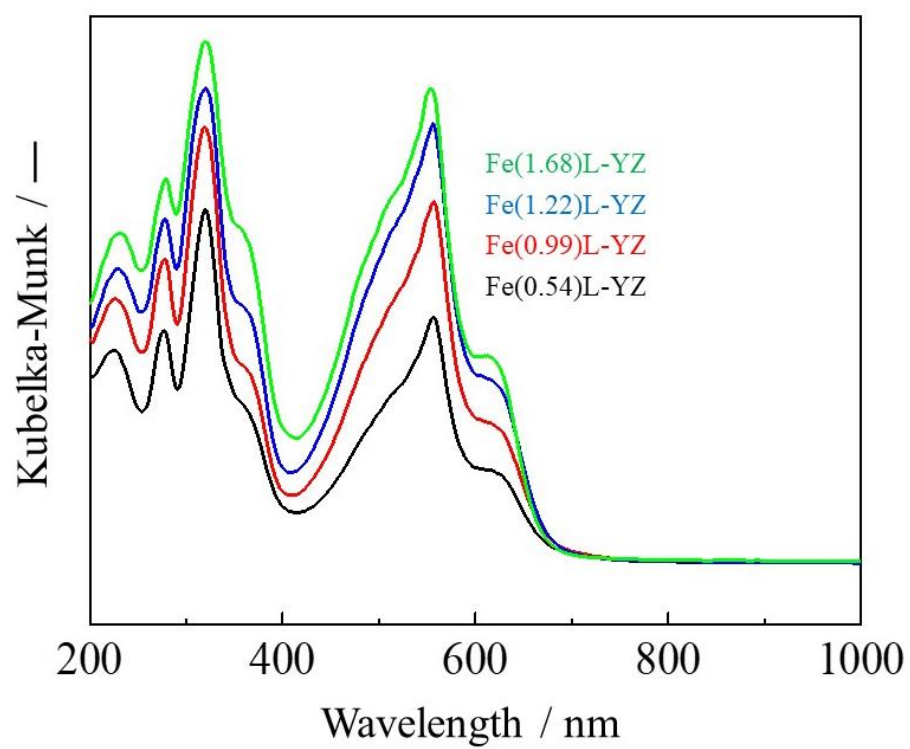

Figure S6. UV-vis. spectra of Fe(X)L-YZ catalysts.



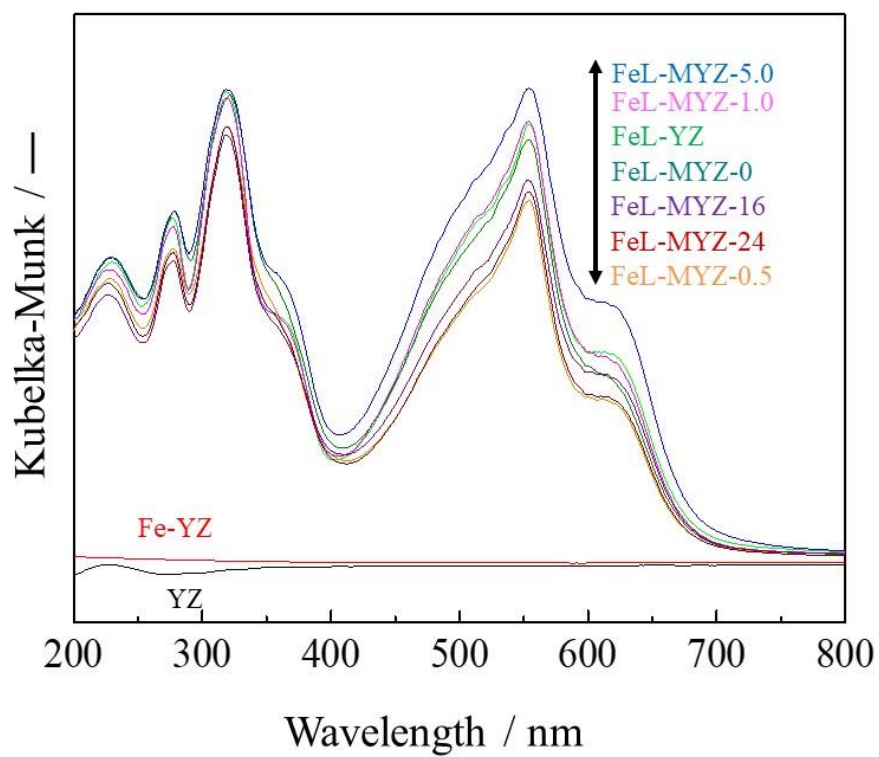

Figure S7. UV-vis. spectra of FeL-MYZ-t and FeL-YZ catalysts.
